# Supplementary material for: The effects of vegetable pickling conditions on the dynamics of microbiota and metabolites
Source: PubMed Central journal article supplement (PMC8034358; doi:10.7717/peerj.11123), 2021-04-06
Supplement: peerj-09-11123-s006.pdf [file peerj-09-11123-s006.pdf]

|                                 |     |                                                                                                     |     |
|---------------------------------|-----|-----------------------------------------------------------------------------------------------------|-----|
| <i>Desulfococcus oleovorans</i> | 27  | VLKNEVITVLGYGVQGAQALNLKDNQFEVVIIGQL <sup>Q</sup> EGDAYWEKAIADGFVPGKTLFPIEE                          | 86  |
|                                 |     | VL + + V+GYG QG AQALN++D+G E II GD+ E+A DGF + +++                                                   |     |
| <i>Halanaerobium congolens</i>  | 16  | VLDDRTVAVIGYGNQGRAQALNMRDSGVENIII <sup>G</sup> NRGDS <sup>S</sup> KEQA <sup>K</sup> KDGF----EAYSMDQ | 71  |
| <i>D. oleovorans</i>            | 87  | AAKKGTTIKMLLSDAGQVAVW-PKVKKCLKKGDALYFSHGFGIVYKDQTGIVPPKNVDVI                                        | 145 |
|                                 |     | AA K I+ L+ D Q V+ K++ LK+GD L F+ G+ I Y I PP+N+DVI                                                  |     |
| <i>H. congolens</i>             | 72  | AANKADILFFLVPDEVQPQVYKEKIEPYLKEGDVLNFASGYNITY---NLITPPENIDVI                                        | 128 |
| <i>D. oleovorans</i>            | 146 | LVAPKGS <sup>G</sup> TN <sup>V</sup> RRNFKDGSGINSSYAVFQDATGRAEERTIALGIAIG---SGYLFPTTTFE             | 202 |
|                                 |     | ++AP+ GT VR ++ G G S A+ Q+ +G+A++ +ALG AIG SG + +F                                                  |     |
| <i>H. congolens</i>             | 129 | MIAPRMIGTMVRELYEVDGAPSFLAINQNYSGKAKDIGLALGKAIGSTRSGIIEIDSFA                                         | 188 |
| <i>D. oleovorans</i>            | 203 | KEVFSDLTGERGVLMGCLAGTMEAQYNVLRKHGHS <sup>P</sup> SEAFNETVEELTQSL---IRLVAE                           | 259 |
|                                 |     | E SDL E+G L+ + M A+Y + G P+ A E L++ L +AE                                                           |     |
| <i>H. congolens</i>             | 189 | LETKSDLLMEQG-LIPIILNAMI <sup>A</sup> KYELEIAEGMP <sup>P</sup> PAGALLELY--LSRELGYIFEKMAE             | 245 |
| <i>D. oleovorans</i>            | 260 | NGMDW <sup>M</sup> FANCSTTAQRGALDWAPKFRDAVA                                                         | 289 |
|                                 |     | G+ S T+Q G + + ++ A                                                                                 |     |
| <i>H. congolens</i>             | 246 | QGIIGQMPLHSQTSQYGQISRIDELQEGEA                                                                      | 275 |
